# Supplementary material for: Pechini synthesis of lanthanide (Eu3+/Tb3+or Dy3+) ions activated BaGd2O4nanostructured phosphors: an approach for tunable emissions
Source: Royal Society of Chemistry journal article supplement (doi:10.1039/c4cp02266a), 2014-07-10
Supplement: c4cp02266a1.pdf [file c4cp02266a1.pdf]

# Pechini synthesis of lanthanide ( $\text{Eu}^{3+}/\text{Tb}^{3+}$ or $\text{Dy}^{3+}$ ) ions activated $\text{BaGd}_2\text{O}_4$ nanostructured phosphors: an approach for tunable emissions

*G. Seeta Rama Raju, E. Pavitra, and Jae Su Yu\**

Department of Electronics and Radio Engineering, Institute for Laser Engineering, Kyung Hee University, 1 Seocheon-dong, Giheung-gu, Yongin-si, Gyeonggi-do 446-701 Republic of Korea.

## **Characterizations:**

XRD pattern of the needles type NBs were recorded on Mac Science (M18XHF-SRA) X-ray powder diffractometer with  $\text{CuK}\alpha = 1.5406 \text{ \AA}$  with a step of  $0.02^\circ$ . The morphology, SAED pattern, and HRTEM analysis were performed using the field emission transmission electron microscope (FE-TEM JEOL JEM-2100F), fitted with the energy dispersive X-ray spectrometer (Oxford INCA). KBr pellet based infrared spectrum was recorded in the range of  $450\text{-}1000 \text{ cm}^{-1}$  with a Perkin Elmer spectrum-100 Fourier transform infrared (FTIR) spectrometer. The room-temperature PL and PLE spectra were recorded on a Photon Technology International (PTI, USA) fluorimeter with a Xe-arc lamp of 60 W power. The digital photographs were taken at the time of PL measurement using Samsung Galaxy-S5 smart phone. The quantum yield measurements were carried out using a fluorescence spectrophotometer equipped with the integrating sphere (Hamamatsu Photonics C9920-02). The CL properties were measured by a Gatan (UK) MonoCL3 system attached with the SEM (Hitachi S-4300 SE).

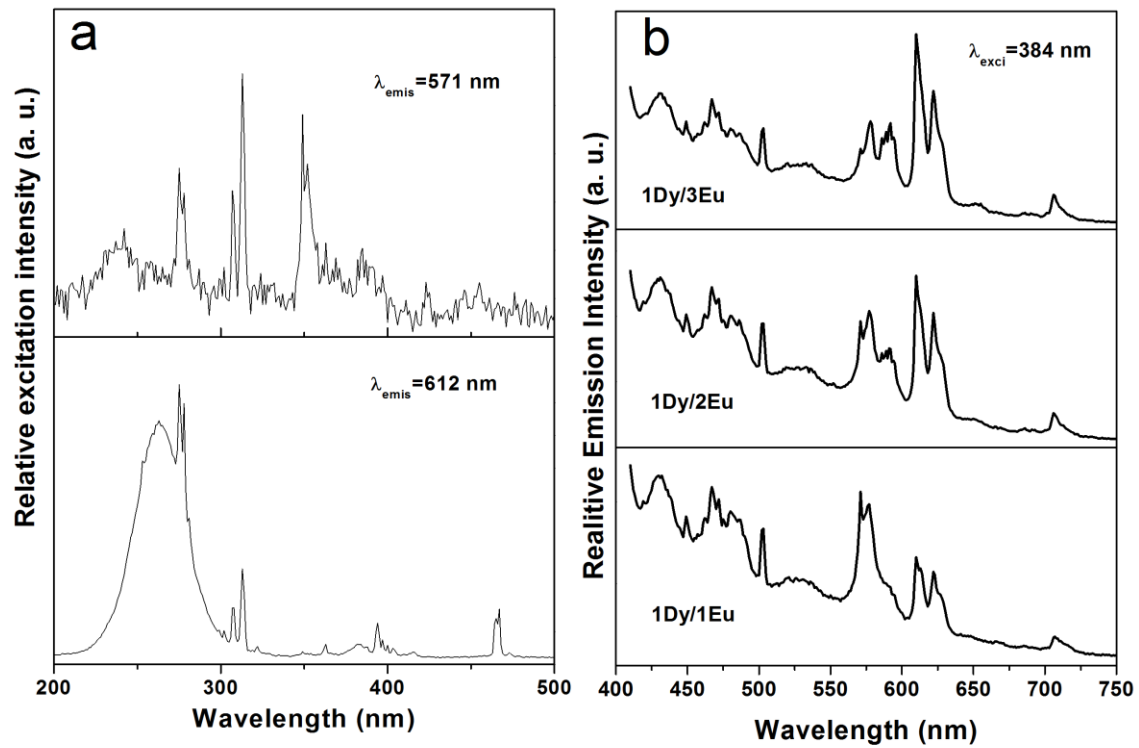

**Fig S1.** (a) PLE and (b) PL spectra of Eu<sup>3+</sup> ions co-activated BG:Dy<sup>3+</sup>

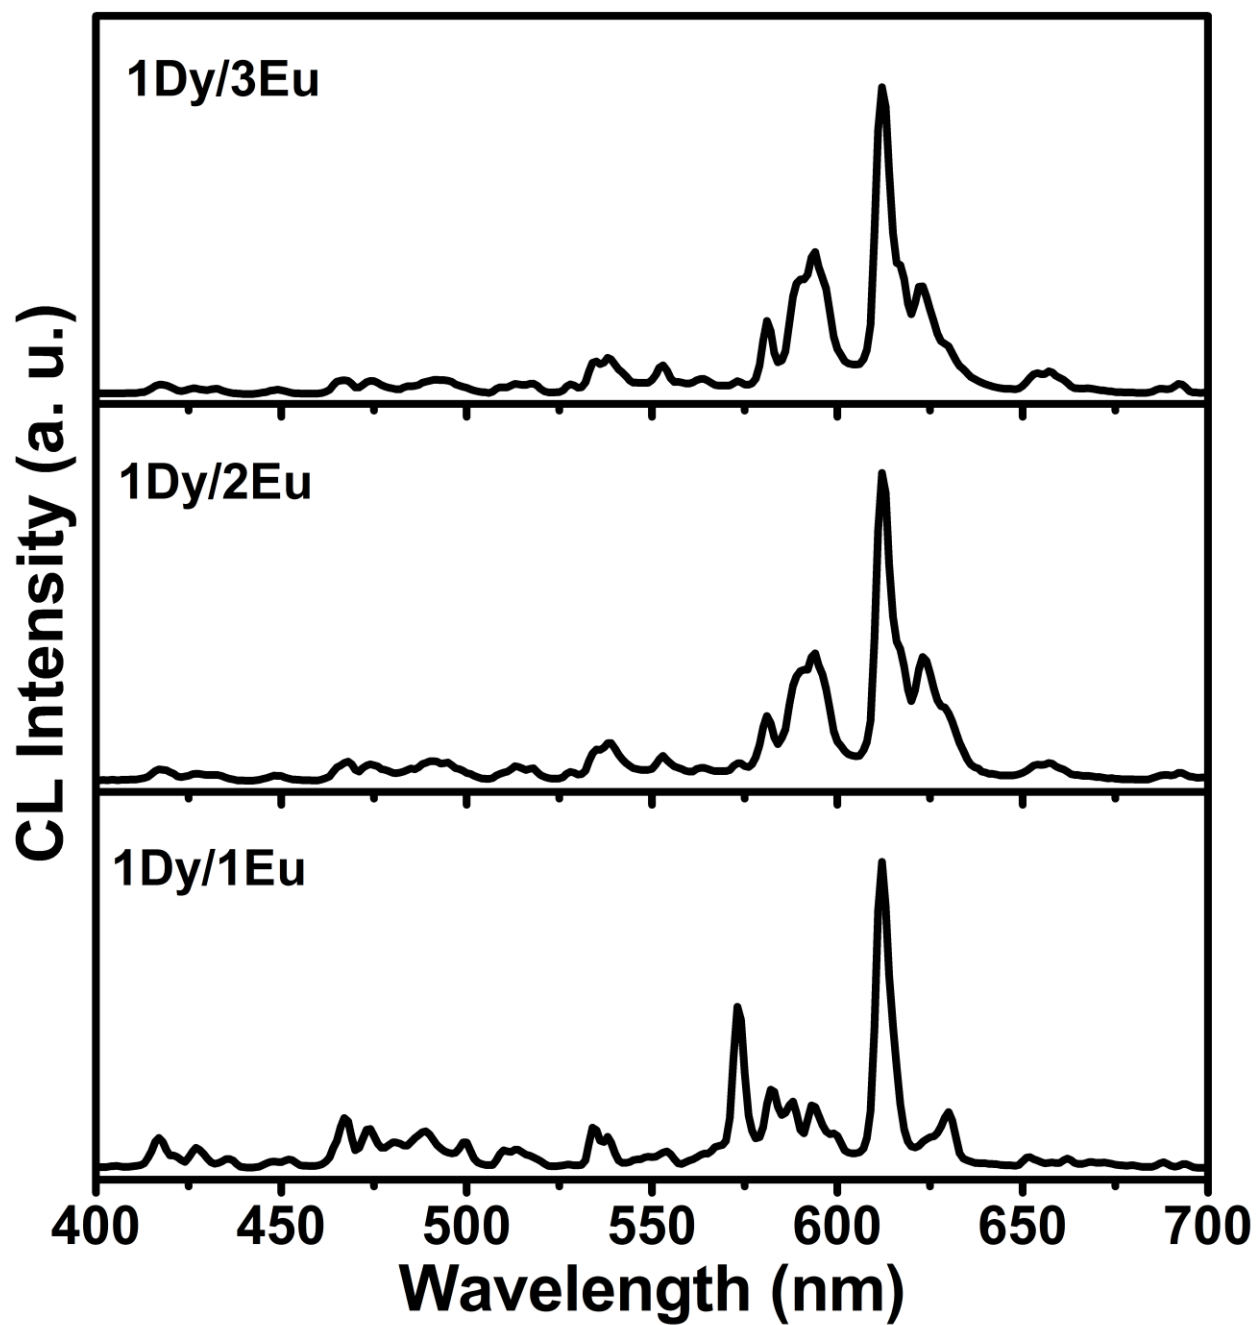

**Fig S2.** CL spectra of Eu<sup>3+</sup> ions co-activated BG:Dy<sup>3+</sup> phosphors at the accelerating voltage of 5kV, and filament current of 55  $\mu$ A
